# Supplementary material for: Efficacy and safety of risankizumab for active psoriatic arthritis: 24-week results from the randomised, double-blind, phase 3 KEEPsAKE 1 trial
Source: PubMed Central journal article supplement — Ann Rheum Dis. 2021 Dec 15;81(2):225–31. doi: 10.1136/annrheumdis-2021-221019 (PMC8762015; doi:10.1136/annrheumdis-2021-221019), 2021-12-15
Supplement: annrheumdis-2021-221019supp001.pdf [file annrheumdis-2021-221019supp001.pdf]

**SUPPLEMENTARY MATERIAL**

**Online supplemental table S1 Patients with missing data due to COVID-19**

| <b>Patients, n/N (%)</b>            | <b>RZB 150 mg<br/>N=483</b> | <b>Placebo<br/>N=481</b> |
|-------------------------------------|-----------------------------|--------------------------|
| <b>Primary</b>                      |                             |                          |
| ACR20 at week 24                    | 7/483 (1.4)                 | 10/481 (2.1)             |
| <b>Ranked secondary</b>             |                             |                          |
| Change in HAQ-DI at week 24         | 7/482 (1.5)                 | 7/479 (1.5)              |
| PASI 90 at week 24                  | 7/273 (2.6)                 | 6/272 (2.2)              |
| ACR20 at week 16                    | 6/483 (1.2)                 | 10/481 (2.1)             |
| MDA at week 24                      | 4/483 (0.8)                 | 3/481 (0.6)              |
| Change in mNAPSI at week 24         | 7/309 (2.2)                 | 5/338 (1.5)              |
| Change in PGA-F at week 24          | 7/309 (2.2)                 | 5/338 (1.5)              |
| Resolution of enthesitis at week 24 | 5/444 (1.1)                 | 7/448 (1.6)              |
| Resolution of dactylitis at week 24 | 2/188 (1.1)                 | 1/204 (0.5)              |
| Change in PsA-mTSS at week 24       | 7/458 (1.5)                 | 6/457 (1.3)              |
| Change in SF-36 PCS at week 24      | 8/482 (1.7)                 | 7/477 (1.5)              |
| Change in FACIT-Fatigue at week 24  | 8/482 (1.7)                 | 7/477 (1.5)              |
| <b>Other secondary</b>              |                             |                          |
| ACR50 at week 24                    | 8/483 (1.7)                 | 9/481 (1.9)              |
| ACR70 at week 24                    | 8/483 (1.7)                 | 9/481 (1.9)              |

ACR20/50/70,  $\geq 20/50/70\%$  improvement in American College of Rheumatology score; FACIT-Fatigue, Functional Assessment of Chronic Illness Therapy-Fatigue Questionnaire; HAQ-DI, Health Assessment Questionnaire-Disability Index; MDA, minimal disease activity; mNAPSI, modified Nail Psoriasis Severity Index; PASI 90,  $\geq 90\%$  reduction in Psoriasis Area and Severity Index; PGA-F, Physician's Global Assessment of Fingernail Psoriasis; PsA-mTSS, psoriatic arthritis-modified Total Sharp Score; RZB, risankizumab; SF-36 PCS, 36 Item Short Form Health Survey Physical Component Summary.

**Online supplemental table S2 ACR Component results at week 24**

| <b>Component</b>                      | <b>RZB 150 mg<br/>N=483</b> | <b>Placebo<br/>N=481</b> | <b>p value</b> |
|---------------------------------------|-----------------------------|--------------------------|----------------|
| Swollen joint count*                  | N=440                       | N=420                    |                |
| Week 24, mean                         | 3.4                         | 5.3                      |                |
| Change from baseline, LS mean (95%CI) | -8.4 (-8.9, -7.8)           | -6.2 (-6.7, -5.6)        | <0.001         |
| Tender joint count†                   | N=440                       | N=420                    |                |
| Week 24, mean                         | 8.4                         | 12.5                     |                |
| Change from baseline, LS mean (95%CI) | -11.2 (-12.2, -10.3)        | -7.1 (-8.0, -6.1)        | <0.001         |
| Patient's assessment of pain score‡   | N=434                       | N=417                    |                |
| Week 24, mean                         | 35.3                        | 45.7                     |                |
| Change from baseline, LS mean (95%CI) | -21.0 (-23.2, -18.8)        | -10.2 (-12.5, -8.0)      | <0.001         |
| PtGA of disease activity‡             | N=434                       | N=417                    |                |
| Week 24, mean                         | 35.1                        | 45.5                     |                |
| Change from baseline, LS mean (95%CI) | -21.6 (-23.9, -19.4)        | -10.5 (-12.8, -8.3)      | <0.001         |
| PGA of disease activity‡              | N=409                       | N=391                    |                |
| Week 24, mean                         | 26.3                        | 39.6                     |                |
| Change from baseline, LS mean (95%CI) | -33.9 (-35.9, -31.8)        | -21.1 (-23.2, -19.0)     | <0.001         |
| HAQ-DI                                | N=434                       | N=417                    |                |
| Week 24, mean                         | 0.83                        | 1.02                     |                |
| Change from baseline, LS mean (95%CI) | -0.31 (-0.36, -0.27)        | -0.11 (-0.16, -0.06)     | <0.001§        |
| hsCRP (mg/L)                          | N=424                       | N=396                    |                |
| Week 24, mean                         | 6.8                         | 10.6                     |                |
| Change from baseline, LS mean (95%CI) | -4.3 (-5.3, -3.3)           | -0.2 (-1.2, 0.8)         | <0.001         |

\*Based on 66 joints.

†Based on 68 joints.

‡Scored as millimeters on a 100-mm horizontal visual analog scale.

§Statistically significant under overall type I error control.

ACR, American College of Rheumatology; HAQ-DI, Health Assessment Questionnaire-Disability Index; hsCRP, high-sensitivity C-reactive protein; LS, least squares; PGA, physician global assessment; PtGA, patient's global assessment; RZB, risankizumab.

**Online supplemental table S3 ACR20 response rate by concomitant medication at baseline**

| <b>Patients, n/N (%)</b>        | <b>RZB 150 mg</b> | <b>PBO</b>     | <b>Difference (95%CI)</b> |
|---------------------------------|-------------------|----------------|---------------------------|
| Concomitant csDMARD at baseline | 212/366 (57.9)    | 131/364 (35.9) | 22.0 (15.0, 29.0)         |
| Any MTX                         | 184/314 (58.6)    | 115/315 (36.4) | 22.1 (14.6, 29.6)         |
| MTX alone                       | 171/294 (58.2)    | 109/286 (37.9) | 20.1 (12.2, 28.0)         |
| MTX and other csDMARD           | 13/20 (65.0)      | 6/29 (21.0)    | 42.6 (22.8, 62.4)         |
| csDMARD other than MTX          | 28/52 (53.8)      | 16/49 (32.7)   | 19.5 (1.0, 37.9)          |
| No csDMARD at baseline          | 65/117 (55.5)     | 31/117 (26.2)  | 30.2 (18.6, 41.7)         |

Non-responder imputation incorporating multiple imputation if there were missing data due to COVID-19 or non-responder imputation if there were no missing data due to COVID-19.

ACR20,  $\geq 20\%$  improvement in American College of Rheumatology score; csDMARD, conventional synthetic disease-modifying antirheumatic drug; MTX, methotrexate; PBO, placebo; RZB, risankizumab.

**Online supplemental table S4 Change from baseline in PsA-mTSS at week 24**

| <b>Patients, n (%)</b>                    | <b>RZB 150 mg<br/>N=458</b> | <b>PBO<br/>N=457</b> | <b>Difference<br/>(95%CI)</b> | <b>p value</b> |
|-------------------------------------------|-----------------------------|----------------------|-------------------------------|----------------|
| PsA-mTSS, change from baseline at week 24 |                             |                      |                               |                |
| ≤0                                        | 423 (92.4)                  | 401 (87.7)           | 4.6 (0.9, 8.4)                | 0.016          |
| ≤0.5                                      | 429 (93.7)                  | 413 (90.4)           | 3.4 (0.0, 6.7)                | 0.052          |

Rate difference, 95% CI, and nominal p-value determined using Cochran-Mantel-Haenszel test adjusting for the stratification, factors of current use of csDMARD (0 vs ≥1), presence of dactylitis (yes vs no), presence of enthesitis (yes vs no) and extent of psoriasis (≥3% BSA or <3% BSA) at baseline.

BSA body surface area; csDMARD, conventional synthetic disease-modifying antirheumatic drugs; PsA-mTSS, psoriatic arthritis–modified Total Sharp Score; PBO, placebo; RZB, risankizumab.

**Online supplemental table S5 Proportion of patients achieving DAPSA\* responses at week 24**

| <b>Patients, n (%)</b>       | <b>RZB 150 mg<br/>N=483</b> | <b>PBO<br/>N=481</b> | <b>Difference<br/>(95%CI)</b> | <b>p value</b> |
|------------------------------|-----------------------------|----------------------|-------------------------------|----------------|
| DAPSA LDA + REM <sup>†</sup> | 199 (41.2)                  | 108 (22.5)           | 18.9<br>(13.2, 24.6)          | <0.001         |
| DAPSA REM <sup>‡</sup>       | 55 (11.3)                   | 16 (3.2)             | 8.1<br>(4.9, 11.3)            | <0.001         |
| ≥50% reduction in DAPSA      | 272 (56.3)                  | 154 (32.0)           | 24.5<br>(18.4, 30.6)          | <0.001         |
| ≥85% reduction in DAPSA      | 79 (16.4)                   | 21 (4.4)             | 12.1<br>(8.3, 15.9)           | <0.001         |

Rate difference, 95% CI, and nominal p-value determined using Cochran-Mantel-Haenszel test adjusting for the stratification, factors of current use of csDMARD (0 vs ≥1), presence of dactylitis (yes vs no), presence of enthesitis (yes vs no) and extent of psoriasis (≥3% BSA or <3% BSA) at baseline.

\*DAPSA mean score at baseline was 45.6 for RZB (n=482) and 45.3 for PBO (n=479).

<sup>†</sup>Defined as DAPSA score ≤14.

<sup>‡</sup>Defined as DAPSA score ≤4.

BSA body surface area; csDMARD, conventional synthetic disease-modifying antirheumatic drugs; DAPSA, Disease Activity index for Psoriatic Arthritis; LDA, low disease activity; PBO, placebo; REM, remission, RZB, risankizumab.
